# Supplementary material for: Dietary Saturated Fats and Health: Are the U.S. Guidelines Evidence-Based?
Source: MDPI journal article supplement (doi:10.3390/nu13103305), 2021-09-22
Supplement: s1 [file s1]

**Table S1: Findings from Studies Reviewed for 2020 US Dietary Guidelines on associations between saturated fats and CVD/CHD events, stroke**

**Studies with Direct Associations**

|                                                                              | Total     | Null result | Increased sat fats assoc.<br>with lower CVD/CHD<br>outcomes (negative result) | Null + Neg | Saturated fats associated<br>with higher CVD/CHD<br>outcome (positive result) | % support of<br>Guidelines policy | % <b>do not</b> support<br>Guidelines policy |              |
|------------------------------------------------------------------------------|-----------|-------------|-------------------------------------------------------------------------------|------------|-------------------------------------------------------------------------------|-----------------------------------|----------------------------------------------|--------------|
| <b>Findings of associations between saturated fats and various endpoints</b> |           |             |                                                                               |            |                                                                               |                                   |                                              |              |
| Total CVD Endpoints, incl. mortality                                         | 15        | 10          | 4                                                                             | 14         | 1                                                                             | 7%                                | 93%                                          |              |
| CHD, CAD, MI, or PAD Endpoints                                               | 15        | 9           | 2                                                                             | 11         | 4                                                                             | 27%                               | 73%                                          |              |
| Stroke                                                                       | 11        | 8           | 3                                                                             | 11         | 0                                                                             | 0%                                | 100%                                         |              |
| <b>Total</b>                                                                 | <b>41</b> | <b>27</b>   | <b>9</b>                                                                      | <b>36</b>  | <b>5</b>                                                                      | <b>12%</b>                        | <b>88%</b>                                   | <b>Total</b> |

**Findings of associations between foods and CVD/CHD endpoints (Stroke n/a)**

|                   |    |   |   |    |   |            |             |       |
|-------------------|----|---|---|----|---|------------|-------------|-------|
| Meat              | 9  |   |   | 5  | 4 | <b>44%</b> | <b>56%</b>  | Meat  |
| CVD endpoints     | 2  | 1 | 0 | 1  | 1 | 50%        | 50%         |       |
| CHD etc endpoints | 7  | 4 | 0 | 4  | 3 | 43%        | 57%         |       |
| Dairy             | 9  |   |   | 9  | 0 | <b>0%</b>  | <b>100%</b> | Dairy |
| CVD endpoints     | 2  | 1 | 1 | 2  | 0 | 0%         | 100%        |       |
| CHD etc endpoints | 7  | 4 | 3 | 7  | 0 | 0%         | 100%        |       |
| Butter            | 8  |   |   | 7  | 1 | <b>13%</b> | <b>88%</b>  | Buter |
| CVD endpoints     | 3  | 3 | 0 | 3  | 0 | 0%         | 100%        |       |
| CHD etc endpoints | 5  | 4 | 0 | 4  | 1 | 20%        | 80%         |       |
| Dairy + butter    | 17 |   |   | 16 | 1 | <b>6%</b>  | <b>94%</b>  |       |

**Modeling Studies**

|                                                                  | Null result | Modeling of replacement<br>associated with higher risk<br>of outcome | Null + Neg | Modeling of replacement<br>associated with lower risk<br>of outcome | % support of<br>Guidelines policy | % <b>do not</b> support<br>Guidelines policy |                  |
|------------------------------------------------------------------|-------------|----------------------------------------------------------------------|------------|---------------------------------------------------------------------|-----------------------------------|----------------------------------------------|------------------|
| <b>Studies using modeling to approximate replacement effects</b> |             |                                                                      |            |                                                                     |                                   |                                              |                  |
| Replacing SFA with PUFA                                          |             |                                                                      |            |                                                                     |                                   |                                              |                  |
| CVD Endpoints                                                    | 6           | 2                                                                    | 1          | 3                                                                   | 3                                 | 50%                                          | 50%              |
| CHD, CAD, MI, or PAD Endpoints                                   | 6           | 3                                                                    | 1          | 4                                                                   | 2                                 | 33%                                          | 67%              |
| Total CVD and CHD                                                | 12          |                                                                      |            | 7                                                                   | 5                                 | <b>42%</b>                                   | <b>58%</b>       |
| Stroke mortality                                                 | 2           | 1                                                                    | 1          | 2                                                                   | 0                                 | 0%                                           | 100%             |
| <b>Total</b>                                                     | <b>26</b>   | <b>6</b>                                                             | <b>3</b>   | <b>16</b>                                                           | <b>10</b>                         | <b>38%</b>                                   | <b>62%</b> Total |

**Notes:**

|  |                           |
|--|---------------------------|
|  | Finding is only for women |
|  | Finding is for men only   |

Source: 2020 Dietary Guidelines Advisory Committee and Nutrition Evidence Systematic Review Team. Types of Dietary Fat and Cardiovascular Disease: A Systematic Review.

2020 Dietary Guidelines Advisory Committee Project. Alexandria, VA: U.S. Department of Agriculture, Food and Nutrition Service, Center for Nutrition Policy and Promotion, July 2020, pp. 16-17.

Available at: <https://nscr.usda.gov/2020-dietary-guidelines-advisory-committee-systematic-reviews>, pp. 43-45.
